# Supplementary material
Source: publisher figshare collection journal article supplement (https://acs.figshare.com/ndownloader/files/4742902)
Supplement: Supplementary file 1 [file 4742902]

 
data_au15m 
 
_audit_creation_method            SHELXL-97 
_chemical_name_systematic 
; 
 ? 
; 
_chemical_name_common             ? 
_chemical_melting_point           ? 
_chemical_formula_moiety          ? 
_chemical_formula_sum 
 'C69 H71 N Ni P3 S3 Se Si3' 
_chemical_formula_weight          1325.30 
 
loop_ 
 _atom_type_symbol 
 _atom_type_description 
 _atom_type_scat_dispersion_real 
 _atom_type_scat_dispersion_imag 
 _atom_type_scat_source 
 'C'  'C'   0.0033   0.0016 
 'International Tables Vol C Tables 4.2.6.8 and 6.1.1.4' 
 'H'  'H'   0.0000   0.0000 
 'International Tables Vol C Tables 4.2.6.8 and 6.1.1.4' 
 'N'  'N'   0.0061   0.0033 
 'International Tables Vol C Tables 4.2.6.8 and 6.1.1.4' 
 'Si'  'Si'   0.0817   0.0704 
 'International Tables Vol C Tables 4.2.6.8 and 6.1.1.4' 
 'P'  'P'   0.1023   0.0942 
 'International Tables Vol C Tables 4.2.6.8 and 6.1.1.4' 
 'S'  'S'   0.1246   0.1234 
 'International Tables Vol C Tables 4.2.6.8 and 6.1.1.4' 
 'Ni'  'Ni'   0.3393   1.1124 
 'International Tables Vol C Tables 4.2.6.8 and 6.1.1.4' 
 'Se'  'Se'  -0.0929   2.2259 
 'International Tables Vol C Tables 4.2.6.8 and 6.1.1.4' 
 
_symmetry_cell_setting            Monoclinic 
_symmetry_space_group_name_H-M    P2(1)/c 
 
loop_ 
 _symmetry_equiv_pos_as_xyz 
 'x, y, z' 
 '-x, y+1/2, -z+1/2' 
 '-x, -y, -z' 
 'x, -y-1/2, z-1/2' 
 
_cell_length_a                    14.0367(10) 
_cell_length_b                    27.3713(19) 
_cell_length_c                    17.2488(12) 
_cell_angle_alpha                 90.00 
_cell_angle_beta                  100.049(2) 
_cell_angle_gamma                 90.00 
_cell_volume                      6525.4(8) 
_cell_formula_units_Z             4 
_cell_measurement_temperature     100(2) 
_cell_measurement_reflns_used     ? 
_cell_measurement_theta_min       ? 
_cell_measurement_theta_max       ? 
 
_exptl_crystal_description        block 
_exptl_crystal_colour             dark-green 
_exptl_crystal_size_max           0.32 
_exptl_crystal_size_mid           0.21 
_exptl_crystal_size_min           0.20 
_exptl_crystal_density_meas       ? 
_exptl_crystal_density_diffrn     1.349 
_exptl_crystal_density_method     'not measured' 
_exptl_crystal_F_000              2756 
_exptl_absorpt_coefficient_mu     1.121 
_exptl_absorpt_correction_type    'Empirical Used SADABS' 
_exptl_absorpt_correction_T_min   0.8766 
_exptl_absorpt_correction_T_max   0.9648
_exptl_absorpt_process_details    ? 
 
_exptl_special_details 
; 
 ? 
; 
 
_diffrn_ambient_temperature       100(2) 
_diffrn_radiation_wavelength      0.71073 
_diffrn_radiation_type            MoK\a 
_diffrn_radiation_source          'fine-focus sealed tube' 
_diffrn_radiation_monochromator   graphite 
_diffrn_measurement_device_type   ? 
_diffrn_measurement_method        ? 
_diffrn_detector_area_resol_mean  ? 
_diffrn_standards_number          ? 
_diffrn_standards_interval_count  ? 
_diffrn_standards_interval_time   ? 
_diffrn_standards_decay_%         ? 
_diffrn_reflns_number             45639 
_diffrn_reflns_av_R_equivalents   0.0595 
_diffrn_reflns_av_sigmaI/netI     0.0835 
_diffrn_reflns_limit_h_min        -18 
_diffrn_reflns_limit_h_max        18 
_diffrn_reflns_limit_k_min        -17 
_diffrn_reflns_limit_k_max        35 
_diffrn_reflns_limit_l_min        -22 
_diffrn_reflns_limit_l_max        22 
_diffrn_reflns_theta_min          1.41 
_diffrn_reflns_theta_max          27.50 
_reflns_number_total              14976 
_reflns_number_gt                 10391 
_reflns_threshold_expression      >2sigma(I) 
 
_computing_data_collection        ? 
_computing_cell_refinement        ? 
_computing_data_reduction         ? 
_computing_structure_solution     'SHELXS-97 (Sheldrick, 1990)' 
_computing_structure_refinement   'SHELXL-97 (Sheldrick, 1997)' 
_computing_molecular_graphics     ? 
_computing_publication_material   ? 
 
_refine_special_details 
; 
 Refinement of F^2^ against ALL reflections.  The weighted R-factor wR and 
 goodness of fit S are based on F^2^, conventional R-factors R are based 
 on F, with F set to zero for negative F^2^. The threshold expression of 
 F^2^ > 2sigma(F^2^) is used only for calculating R-factors(gt) etc. and is 
 not relevant to the choice of reflections for refinement.  R-factors based 
 on F^2^ are statistically about twice as large as those based on F, and R- 
 factors based on ALL data will be even larger. 
; 
 
_refine_ls_structure_factor_coef  Fsqd  
_refine_ls_matrix_type            full 
_refine_ls_weighting_scheme       calc  
_refine_ls_weighting_details 
 'calc w=1/[\s^2^(Fo^2^)+(0.0970P)^2^+5.0139P] where P=(Fo^2^+2Fc^2^)/3' 
_atom_sites_solution_primary      direct 
_atom_sites_solution_secondary    difmap 
_atom_sites_solution_hydrogens    geom 
_refine_ls_hydrogen_treatment     mixed 
_refine_ls_extinction_method      none 
_refine_ls_extinction_coef        ? 
_refine_ls_number_reflns          14976 
_refine_ls_number_parameters      739 
_refine_ls_number_restraints      0 
_refine_ls_R_factor_all           0.0905 
_refine_ls_R_factor_gt            0.0647 
_refine_ls_wR_factor_ref          0.1872 
_refine_ls_wR_factor_gt           0.1771 
_refine_ls_goodness_of_fit_ref    1.039 
_refine_ls_restrained_S_all       1.039 
_refine_ls_shift/su_max           0.001 
_refine_ls_shift/su_mean          0.000 
 
loop_ 
 _atom_site_label 
 _atom_site_type_symbol 
 _atom_site_fract_x 
 _atom_site_fract_y 
 _atom_site_fract_z 
 _atom_site_U_iso_or_equiv 
 _atom_site_adp_type 
 _atom_site_occupancy 
 _atom_site_symmetry_multiplicity 
 _atom_site_calc_flag 
 _atom_site_refinement_flags 
 _atom_site_disorder_assembly 
 _atom_site_disorder_group 
Ni Ni 0.14667(4) 0.29371(2) 0.91213(3) 0.01451(14) Uani 1 1 d . . . 
Se1 Se 0.10333(5) 0.33760(2) 1.01762(4) 0.04329(18) Uani 1 1 d . . . 
S1 S 0.28426(8) 0.26274(4) 0.98629(6) 0.0172(2) Uani 1 1 d . . . 
S2 S 0.19090(8) 0.36387(4) 0.85504(6) 0.0170(2) Uani 1 1 d . . . 
S3 S 0.01360(8) 0.24881(4) 0.89166(6) 0.0178(2) Uani 1 1 d . . . 
Si1 Si 0.50032(9) 0.21296(5) 1.05355(7) 0.0205(3) Uani 1 1 d . . . 
Si2 Si 0.15437(9) 0.45344(4) 0.71433(7) 0.0172(3) Uani 1 1 d . . . 
Si3 Si -0.17131(9) 0.17511(5) 0.82101(8) 0.0233(3) Uani 1 1 d . . . 
P1 P 0.18873(8) 0.25790(4) 0.81365(6) 0.0132(2) Uani 1 1 d . . . 
P2 P 0.38183(8) 1.02667(4) 0.79762(6) 0.0132(2) Uani 1 1 d . . . 
P3 P 0.30012(8) 0.93751(4) 0.71203(6) 0.0139(2) Uani 1 1 d . . . 
C1 C -0.0271(4) 0.3245(2) 1.0305(3) 0.0343(12) Uani 1 1 d . . . 
C2 C -0.0948(5) 0.3631(2) 1.0211(3) 0.0434(15) Uani 1 1 d . . . 
H2 H -0.0783 0.3940 1.0022 0.052 Uiso 1 1 calc R . . 
C3 C -0.1862(4) 0.3554(3) 1.0399(4) 0.0477(16) Uani 1 1 d . . . 
H3 H -0.2315 0.3815 1.0339 0.057 Uiso 1 1 calc R . . 
C4 C -0.2120(5) 0.3122(3) 1.0660(4) 0.0481(16) Uani 1 1 d . . . 
H4 H -0.2748 0.3078 1.0784 0.058 Uiso 1 1 calc R . . 
C5 C -0.1460(4) 0.2737(2) 1.0749(3) 0.0429(15) Uani 1 1 d . . . 
H5 H -0.1645 0.2429 1.0928 0.052 Uiso 1 1 calc R . . 
C6 C -0.0557(4) 0.2796(2) 1.0581(3) 0.0358(13) Uani 1 1 d . . . 
H6 H -0.0115 0.2530 1.0652 0.043 Uiso 1 1 calc R . . 
C7 C 0.3510(3) 0.23722(15) 0.9188(2) 0.0144(8) Uani 1 1 d . . . 
C8 C 0.4450(3) 0.21784(15) 0.9454(2) 0.0165(9) Uani 1 1 d . . . 
C9 C 0.4962(3) 0.20161(16) 0.8882(3) 0.0205(9) Uani 1 1 d . . . 
H9 H 0.5595 0.1890 0.9047 0.025 Uiso 1 1 calc R . . 
C10 C 0.4591(3) 0.20299(16) 0.8075(3) 0.0196(9) Uani 1 1 d . . . 
H10 H 0.4967 0.1918 0.7703 0.024 Uiso 1 1 calc R . . 
C11 C 0.3669(3) 0.22089(16) 0.7827(3) 0.0192(9) Uani 1 1 d . . . 
H11 H 0.3407 0.2223 0.7281 0.023 Uiso 1 1 calc R . . 
C12 C 0.3121(3) 0.23698(15) 0.8379(2) 0.0141(8) Uani 1 1 d . . . 
C13 C 0.1768(3) 0.34940(16) 0.7539(2) 0.0137(8) Uani 1 1 d . . . 
C14 C 0.1644(3) 0.38617(16) 0.6951(2) 0.0164(9) Uani 1 1 d . . . 
C15 C 0.1532(3) 0.37011(16) 0.6166(2) 0.0180(9) Uani 1 1 d . . . 
H15 H 0.1458 0.3940 0.5760 0.022 Uiso 1 1 calc R . . 
C16 C 0.1524(3) 0.32128(17) 0.5953(2) 0.0193(9) Uani 1 1 d . . . 
H16 H 0.1446 0.3124 0.5413 0.023 Uiso 1 1 calc R . . 
C17 C 0.1628(3) 0.28606(16) 0.6521(2) 0.0160(9) Uani 1 1 d . . . 
H17 H 0.1615 0.2525 0.6379 0.019 Uiso 1 1 calc R . . 
C18 C 0.1755(3) 0.29978(15) 0.7322(2) 0.0141(8) Uani 1 1 d . . . 
C19 C 0.0252(3) 0.20693(15) 0.8155(2) 0.0144(8) Uani 1 1 d . . . 
C20 C -0.0494(3) 0.17284(16) 0.7895(2) 0.0178(9) Uani 1 1 d . . . 
C21 C -0.0297(3) 0.13725(16) 0.7362(2) 0.0190(9) Uani 1 1 d . . . 
H21 H -0.0782 0.1137 0.7181 0.023 Uiso 1 1 calc R . . 
C22 C 0.0567(3) 0.13471(16) 0.7087(3) 0.0206(10) Uani 1 1 d . . . 
H22 H 0.0679 0.1088 0.6747 0.025 Uiso 1 1 calc R . . 
C23 C 0.1273(3) 0.17008(16) 0.7309(2) 0.0178(9) Uani 1 1 d . . . 
H23 H 0.1859 0.1696 0.7105 0.021 Uiso 1 1 calc R . . 
C24 C 0.1101(3) 0.20647(15) 0.7841(2) 0.0163(9) Uani 1 1 d . . . 
C25 C 0.5164(4) 0.27357(19) 1.1036(3) 0.0294(11) Uani 1 1 d . . . 
H25A H 0.5572 0.2698 1.1555 0.044 Uiso 1 1 calc R . . 
H25B H 0.4531 0.2865 1.1099 0.044 Uiso 1 1 calc R . . 
H25C H 0.5474 0.2963 1.0717 0.044 Uiso 1 1 calc R . . 
C26 C 0.4275(4) 0.1712(2) 1.1060(3) 0.0395(14) Uani 1 1 d . . . 
H26A H 0.4590 0.1679 1.1611 0.059 Uiso 1 1 calc R . . 
H26B H 0.4228 0.1390 1.0806 0.059 Uiso 1 1 calc R . . 
H26C H 0.3625 0.1848 1.1037 0.059 Uiso 1 1 calc R . . 
C27 C 0.6246(4) 0.1863(2) 1.0612(3) 0.0360(13) Uani 1 1 d . . . 
H27A H 0.6630 0.2066 1.0312 0.054 Uiso 1 1 calc R . . 
H27B H 0.6199 0.1531 1.0397 0.054 Uiso 1 1 calc R . . 
H27C H 0.6560 0.1854 1.1165 0.054 Uiso 1 1 calc R . . 
C28 C 0.0528(3) 0.46725(17) 0.7685(3) 0.0238(10) Uani 1 1 d . . . 
H28A H 0.0619 0.4487 0.8178 0.036 Uiso 1 1 calc R . . 
H28B H -0.0089 0.4580 0.7358 0.036 Uiso 1 1 calc R . . 
H28C H 0.0522 0.5023 0.7801 0.036 Uiso 1 1 calc R . . 
C29 C 0.2716(3) 0.47799(18) 0.7686(3) 0.0290(11) Uani 1 1 d . . . 
H29A H 0.2906 0.4598 0.8178 0.044 Uiso 1 1 calc R . . 
H29B H 0.2640 0.5126 0.7805 0.044 Uiso 1 1 calc R . . 
H29C H 0.3217 0.4744 0.7359 0.044 Uiso 1 1 calc R . . 
C30 C 0.1256(4) 0.48577(17) 0.6171(3) 0.0257(10) Uani 1 1 d . . . 
H30A H 0.1219 0.5210 0.6259 0.039 Uiso 1 1 calc R . . 
H30B H 0.0633 0.4741 0.5882 0.039 Uiso 1 1 calc R . . 
H30C H 0.1765 0.4791 0.5862 0.039 Uiso 1 1 calc R . . 
C31 C -0.1568(4) 0.1601(2) 0.9279(3) 0.0347(13) Uani 1 1 d . . . 
H31A H -0.2177 0.1664 0.9465 0.052 Uiso 1 1 calc R . . 
H31B H -0.1054 0.1804 0.9575 0.052 Uiso 1 1 calc R . . 
H31C H -0.1395 0.1255 0.9359 0.052 Uiso 1 1 calc R . . 
C32 C -0.2306(4) 0.2355(2) 0.8001(4) 0.0389(14) Uani 1 1 d . . . 
H32A H -0.2956 0.2345 0.8135 0.058 Uiso 1 1 calc R . . 
H32B H -0.2353 0.2432 0.7440 0.058 Uiso 1 1 calc R . . 
H32C H -0.1922 0.2607 0.8316 0.058 Uiso 1 1 calc R . . 
C33 C -0.2509(4) 0.1279(2) 0.7650(3) 0.0319(12) Uani 1 1 d . . . 
H33A H -0.2232 0.0954 0.7777 0.048 Uiso 1 1 calc R . . 
H33B H -0.2561 0.1339 0.7084 0.048 Uiso 1 1 calc R . . 
H33C H -0.3154 0.1295 0.7794 0.048 Uiso 1 1 calc R . . 
C34 C 0.2903(3) 1.05762(16) 0.8412(2) 0.0149(8) Uani 1 1 d . . . 
C35 C 0.3066(3) 1.10335(16) 0.8777(2) 0.0176(9) Uani 1 1 d . . . 
H35 H 0.3666 1.1196 0.8787 0.021 Uiso 1 1 calc R . . 
C36 C 0.2352(3) 1.12481(16) 0.9124(2) 0.0184(9) Uani 1 1 d . . . 
H36 H 0.2473 1.1553 0.9387 0.022 Uiso 1 1 calc R . . 
C37 C 0.1462(3) 1.10208(16) 0.9091(2) 0.0183(9) Uani 1 1 d . . . 
H37 H 0.0968 1.1174 0.9318 0.022 Uiso 1 1 calc R . . 
C38 C 0.1294(3) 1.05691(17) 0.8724(3) 0.0210(10) Uani 1 1 d . . . 
H38 H 0.0688 1.0411 0.8703 0.025 Uiso 1 1 calc R . . 
C39 C 0.2019(3) 1.03503(16) 0.8389(3) 0.0186(9) Uani 1 1 d . . . 
H39 H 0.1904 1.0041 0.8140 0.022 Uiso 1 1 calc R . . 
C40 C 0.4940(3) 1.02586(16) 0.8671(2) 0.0158(9) Uani 1 1 d . . . 
C41 C 0.5493(3) 1.06796(17) 0.8834(3) 0.0231(10) Uani 1 1 d . . . 
H41 H 0.5282 1.0978 0.8581 0.028 Uiso 1 1 calc R . . 
C42 C 0.6356(3) 1.06615(19) 0.9368(3) 0.0283(11) Uani 1 1 d . . . 
H42 H 0.6733 1.0949 0.9483 0.034 Uiso 1 1 calc R . . 
C43 C 0.6669(3) 1.02270(19) 0.9733(3) 0.0264(11) Uani 1 1 d . . . 
H43 H 0.7255 1.0217 1.0104 0.032 Uiso 1 1 calc R . . 
C44 C 0.6124(3) 0.98033(19) 0.9558(3) 0.0247(11) Uani 1 1 d . . . 
H44 H 0.6346 0.9503 0.9800 0.030 Uiso 1 1 calc R . . 
C45 C 0.5260(3) 0.98195(17) 0.9031(2) 0.0186(9) Uani 1 1 d . . . 
H45 H 0.4885 0.9531 0.8916 0.022 Uiso 1 1 calc R . . 
C46 C 0.4034(3) 1.06070(15) 0.7134(2) 0.0172(9) Uani 1 1 d . . . 
C47 C 0.3322(3) 1.09064(16) 0.6713(3) 0.0222(10) Uani 1 1 d . . . 
H47 H 0.2733 1.0962 0.6900 0.027 Uiso 1 1 calc R . . 
C48 C 0.3480(4) 1.11228(18) 0.6017(3) 0.0305(12) Uani 1 1 d . . . 
H48 H 0.2998 1.1329 0.5732 0.037 Uiso 1 1 calc R . . 
C49 C 0.4317(4) 1.1043(2) 0.5740(3) 0.0356(13) Uani 1 1 d . . . 
H49 H 0.4410 1.1190 0.5259 0.043 Uiso 1 1 calc R . . 
C50 C 0.5031(4) 1.0752(2) 0.6152(3) 0.0369(13) Uani 1 1 d . . . 
H50 H 0.5617 1.0701 0.5959 0.044 Uiso 1 1 calc R . . 
C51 C 0.4895(3) 1.05308(19) 0.6851(3) 0.0269(11) Uani 1 1 d . . . 
H51 H 0.5386 1.0329 0.7135 0.032 Uiso 1 1 calc R . . 
C52 C 0.2433(3) 0.96930(16) 0.6249(2) 0.0186(9) Uani 1 1 d . . . 
C53 C 0.1530(3) 0.99115(17) 0.6230(3) 0.0248(10) Uani 1 1 d . . . 
H53 H 0.1184 0.9862 0.6649 0.030 Uiso 1 1 calc R . . 
C54 C 0.1144(4) 1.02020(18) 0.5592(3) 0.0313(12) Uani 1 1 d . . . 
H54 H 0.0525 1.0346 0.5573 0.038 Uiso 1 1 calc R . . 
C55 C 0.1645(4) 1.0284(2) 0.4985(3) 0.0379(14) Uani 1 1 d . . . 
H55 H 0.1379 1.0488 0.4557 0.045 Uiso 1 1 calc R . . 
C56 C 0.2545(5) 1.0065(2) 0.5005(3) 0.0387(14) Uani 1 1 d . . . 
H56 H 0.2892 1.0120 0.4587 0.046 Uiso 1 1 calc R . . 
C57 C 0.2933(4) 0.97693(18) 0.5631(3) 0.0265(11) Uani 1 1 d . . . 
H57 H 0.3544 0.9618 0.5640 0.032 Uiso 1 1 calc R . . 
C58 C 0.3860(3) 0.89614(16) 0.6819(3) 0.0175(9) Uani 1 1 d . . . 
C59 C 0.3558(4) 0.85620(19) 0.6355(3) 0.0310(12) Uani 1 1 d . . . 
H59 H 0.2889 0.8485 0.6226 0.037 Uiso 1 1 calc R . . 
C60 C 0.4239(4) 0.8270(2) 0.6074(3) 0.0393(14) Uani 1 1 d . . . 
H60 H 0.4032 0.7997 0.5749 0.047 Uiso 1 1 calc R . . 
C61 C 0.5203(4) 0.83774(18) 0.6265(3) 0.0280(11) Uani 1 1 d . . . 
H61 H 0.5664 0.8181 0.6066 0.034 Uiso 1 1 calc R . . 
C62 C 0.5505(4) 0.87670(19) 0.6741(3) 0.0313(12) Uani 1 1 d . . . 
H62 H 0.6177 0.8837 0.6876 0.038 Uiso 1 1 calc R . . 
C63 C 0.4839(3) 0.90628(18) 0.7031(3) 0.0248(10) Uani 1 1 d . . . 
H63 H 0.5053 0.9330 0.7368 0.030 Uiso 1 1 calc R . . 
C64 C 0.2092(3) 0.90290(16) 0.7500(3) 0.0174(9) Uani 1 1 d . . . 
C65 C 0.1364(3) 0.87782(16) 0.7008(3) 0.0208(10) Uani 1 1 d . . . 
H65 H 0.1325 0.8790 0.6453 0.025 Uiso 1 1 calc R . . 
C66 C 0.0691(3) 0.85081(18) 0.7339(3) 0.0298(12) Uani 1 1 d . . . 
H66 H 0.0196 0.8332 0.7008 0.036 Uiso 1 1 calc R . . 
C67 C 0.0745(3) 0.84962(18) 0.8143(3) 0.0287(11) Uani 1 1 d . . . 
H67 H 0.0282 0.8314 0.8364 0.034 Uiso 1 1 calc R . . 
C68 C 0.1460(3) 0.87451(18) 0.8626(3) 0.0276(11) Uani 1 1 d . . . 
H68 H 0.1490 0.8734 0.9180 0.033 Uiso 1 1 calc R . . 
C69 C 0.2145(3) 0.90147(17) 0.8314(3) 0.0217(10) Uani 1 1 d . . . 
H69 H 0.2642 0.9186 0.8651 0.026 Uiso 1 1 calc R . . 
N1 N 0.3529(3) 0.97165(13) 0.7800(2) 0.0154(7) Uani 1 1 d . . . 
 
loop_ 
 _atom_site_aniso_label 
 _atom_site_aniso_U_11 
 _atom_site_aniso_U_22 
 _atom_site_aniso_U_33 
 _atom_site_aniso_U_23 
 _atom_site_aniso_U_13 
 _atom_site_aniso_U_12 
Ni 0.0158(3) 0.0153(3) 0.0136(3) -0.0003(2) 0.0059(2) -0.0007(2) 
Se1 0.0442(4) 0.0469(4) 0.0436(3) -0.0150(3) 0.0212(3) -0.0187(3) 
S1 0.0181(5) 0.0202(6) 0.0136(5) -0.0008(4) 0.0035(4) 0.0001(4) 
S2 0.0230(6) 0.0158(5) 0.0124(5) -0.0003(4) 0.0035(4) -0.0030(4) 
S3 0.0167(5) 0.0187(5) 0.0196(5) -0.0045(4) 0.0079(4) -0.0042(4) 
Si1 0.0186(6) 0.0225(7) 0.0189(6) 0.0024(5) -0.0009(5) 0.0022(5) 
Si2 0.0172(6) 0.0143(6) 0.0210(6) 0.0023(5) 0.0059(5) 0.0000(5) 
Si3 0.0192(6) 0.0240(7) 0.0276(7) -0.0035(6) 0.0070(5) -0.0077(6) 
P1 0.0136(5) 0.0141(5) 0.0125(5) 0.0012(4) 0.0036(4) 0.0008(4) 
P2 0.0126(5) 0.0114(5) 0.0159(5) -0.0004(4) 0.0027(4) 0.0007(4) 
P3 0.0144(5) 0.0124(5) 0.0151(5) -0.0018(4) 0.0035(4) 0.0011(4) 
C1 0.033(3) 0.045(3) 0.028(3) -0.003(2) 0.011(2) -0.002(3) 
C2 0.052(4) 0.047(4) 0.029(3) 0.000(3) 0.002(3) 0.003(3) 
C3 0.036(3) 0.059(4) 0.044(4) -0.005(3) -0.006(3) 0.014(3) 
C4 0.034(3) 0.063(4) 0.047(4) -0.017(3) 0.008(3) -0.006(3) 
C5 0.049(4) 0.051(4) 0.031(3) -0.003(3) 0.014(3) -0.014(3) 
C6 0.038(3) 0.034(3) 0.034(3) -0.003(2) 0.000(2) 0.005(3) 
C7 0.016(2) 0.011(2) 0.017(2) 0.0019(16) 0.0039(16) -0.0031(17) 
C8 0.017(2) 0.014(2) 0.019(2) -0.0011(17) 0.0018(17) -0.0024(17) 
C9 0.016(2) 0.016(2) 0.029(2) -0.0006(19) 0.0024(19) 0.0016(18) 
C10 0.018(2) 0.022(2) 0.020(2) 0.0011(18) 0.0064(18) 0.0010(19) 
C11 0.020(2) 0.020(2) 0.018(2) 0.0023(18) 0.0053(18) -0.0008(19) 
C12 0.0121(19) 0.012(2) 0.018(2) 0.0018(16) 0.0022(16) -0.0022(17) 
C13 0.0119(19) 0.020(2) 0.0098(19) 0.0015(16) 0.0027(15) 0.0012(17) 
C14 0.011(2) 0.020(2) 0.018(2) -0.0012(18) 0.0052(17) -0.0003(17) 
C15 0.022(2) 0.021(2) 0.012(2) 0.0063(17) 0.0032(17) 0.0062(19) 
C16 0.022(2) 0.026(2) 0.011(2) -0.0021(18) 0.0068(17) 0.002(2) 
C17 0.018(2) 0.016(2) 0.017(2) -0.0064(17) 0.0098(17) -0.0020(18) 
C18 0.0103(19) 0.016(2) 0.016(2) 0.0004(17) 0.0014(16) -0.0010(17) 
C19 0.018(2) 0.011(2) 0.014(2) 0.0006(16) 0.0022(16) -0.0009(17) 
C20 0.018(2) 0.019(2) 0.017(2) 0.0059(18) 0.0035(17) -0.0008(18) 
C21 0.024(2) 0.015(2) 0.016(2) 0.0000(17) -0.0019(18) -0.0040(19) 
C22 0.030(3) 0.015(2) 0.017(2) -0.0012(18) 0.0042(19) 0.0009(19) 
C23 0.021(2) 0.017(2) 0.016(2) 0.0010(17) 0.0047(17) 0.0027(18) 
C24 0.016(2) 0.015(2) 0.017(2) 0.0023(17) 0.0024(17) -0.0008(18) 
C25 0.029(3) 0.036(3) 0.022(2) -0.011(2) 0.001(2) -0.002(2) 
C26 0.037(3) 0.041(3) 0.037(3) 0.020(3) -0.003(2) -0.003(3) 
C27 0.029(3) 0.045(3) 0.030(3) -0.006(2) -0.007(2) 0.014(3) 
C28 0.025(2) 0.018(2) 0.030(3) 0.000(2) 0.011(2) 0.005(2) 
C29 0.025(3) 0.018(2) 0.043(3) 0.001(2) 0.003(2) -0.002(2) 
C30 0.028(3) 0.020(2) 0.030(3) 0.007(2) 0.009(2) 0.003(2) 
C31 0.038(3) 0.047(3) 0.022(3) -0.010(2) 0.015(2) -0.019(3) 
C32 0.020(3) 0.033(3) 0.064(4) -0.001(3) 0.007(3) -0.002(2) 
C33 0.027(3) 0.036(3) 0.033(3) -0.004(2) 0.003(2) -0.015(2) 
C34 0.016(2) 0.016(2) 0.0135(19) 0.0005(16) 0.0045(16) 0.0031(17) 
C35 0.017(2) 0.017(2) 0.020(2) 0.0010(18) 0.0057(17) 0.0008(18) 
C36 0.023(2) 0.015(2) 0.017(2) 0.0006(17) 0.0014(18) 0.0012(18) 
C37 0.018(2) 0.022(2) 0.015(2) 0.0045(18) 0.0029(17) 0.0045(19) 
C38 0.016(2) 0.022(2) 0.026(2) -0.0059(19) 0.0075(18) -0.0029(19) 
C39 0.018(2) 0.018(2) 0.020(2) -0.0039(18) 0.0029(17) -0.0003(18) 
C40 0.013(2) 0.021(2) 0.014(2) -0.0021(17) 0.0045(16) -0.0011(18) 
C41 0.017(2) 0.020(2) 0.032(3) -0.002(2) 0.0036(19) 0.0019(19) 
C42 0.018(2) 0.032(3) 0.034(3) -0.015(2) 0.002(2) -0.004(2) 
C43 0.019(2) 0.039(3) 0.021(2) -0.007(2) 0.0016(19) 0.005(2) 
C44 0.025(2) 0.031(3) 0.018(2) 0.003(2) 0.0036(19) 0.011(2) 
C45 0.019(2) 0.020(2) 0.017(2) -0.0013(18) 0.0050(17) -0.0004(19) 
C46 0.021(2) 0.011(2) 0.020(2) -0.0017(17) 0.0071(18) -0.0009(18) 
C47 0.022(2) 0.017(2) 0.027(2) -0.0009(19) 0.0026(19) 0.0032(19) 
C48 0.037(3) 0.023(3) 0.031(3) 0.012(2) 0.003(2) 0.002(2) 
C49 0.047(3) 0.031(3) 0.030(3) 0.012(2) 0.009(2) -0.009(3) 
C50 0.036(3) 0.042(3) 0.037(3) 0.009(3) 0.019(2) 0.001(3) 
C51 0.023(2) 0.028(3) 0.032(3) 0.009(2) 0.012(2) 0.005(2) 
C52 0.026(2) 0.014(2) 0.014(2) -0.0010(17) -0.0005(18) 0.0000(19) 
C53 0.028(3) 0.023(2) 0.022(2) 0.000(2) 0.000(2) 0.005(2) 
C54 0.032(3) 0.024(3) 0.032(3) 0.001(2) -0.011(2) 0.003(2) 
C55 0.056(4) 0.034(3) 0.018(2) 0.006(2) -0.008(2) -0.006(3) 
C56 0.059(4) 0.038(3) 0.021(3) 0.005(2) 0.011(3) -0.003(3) 
C57 0.033(3) 0.026(3) 0.022(2) 0.001(2) 0.008(2) 0.002(2) 
C58 0.019(2) 0.014(2) 0.021(2) 0.0012(17) 0.0078(18) 0.0044(18) 
C59 0.023(3) 0.033(3) 0.037(3) -0.015(2) 0.006(2) 0.001(2) 
C60 0.041(3) 0.031(3) 0.045(3) -0.018(3) 0.004(3) 0.012(3) 
C61 0.030(3) 0.027(3) 0.030(3) -0.001(2) 0.014(2) 0.014(2) 
C62 0.017(2) 0.030(3) 0.050(3) 0.000(2) 0.013(2) 0.005(2) 
C63 0.020(2) 0.022(2) 0.033(3) -0.006(2) 0.006(2) 0.002(2) 
C64 0.015(2) 0.014(2) 0.023(2) -0.0004(18) 0.0035(17) 0.0025(17) 
C65 0.018(2) 0.020(2) 0.024(2) -0.0068(19) 0.0035(18) -0.0004(19) 
C66 0.016(2) 0.023(3) 0.050(3) -0.012(2) 0.004(2) -0.003(2) 
C67 0.017(2) 0.022(3) 0.048(3) 0.009(2) 0.011(2) 0.001(2) 
C68 0.025(3) 0.031(3) 0.029(3) 0.011(2) 0.010(2) 0.002(2) 
C69 0.021(2) 0.022(2) 0.020(2) 0.0048(19) 0.0000(18) 0.002(2) 
N1 0.0183(18) 0.0133(18) 0.0149(17) -0.0007(14) 0.0039(14) 0.0008(15) 
 
_geom_special_details 
; 
 All esds (except the esd in the dihedral angle between two l.s. planes) 
 are estimated using the full covariance matrix.  The cell esds are taken 
 into account individually in the estimation of esds in distances, angles 
 and torsion angles; correlations between esds in cell parameters are only 
 used when they are defined by crystal symmetry.  An approximate (isotropic) 
 treatment of cell esds is used for estimating esds involving l.s. planes. 
; 
 
loop_ 
 _geom_bond_atom_site_label_1 
 _geom_bond_atom_site_label_2 
 _geom_bond_distance 
 _geom_bond_site_symmetry_2 
 _geom_bond_publ_flag 
Ni P1 2.1318(12) . ? 
Ni S3 2.2122(12) . ? 
Ni S1 2.2853(12) . ? 
Ni S2 2.2927(12) . ? 
Ni Se1 2.3473(8) . ? 
Se1 C1 1.916(5) . ? 
S1 C7 1.761(4) . ? 
S2 C13 1.766(4) . ? 
S3 C19 1.772(4) . ? 
Si1 C25 1.865(5) . ? 
Si1 C26 1.869(5) . ? 
Si1 C27 1.874(5) . ? 
Si1 C8 1.896(4) . ? 
Si2 C29 1.871(5) . ? 
Si2 C28 1.874(5) . ? 
Si2 C30 1.878(5) . ? 
Si2 C14 1.880(5) . ? 
Si3 C32 1.857(6) . ? 
Si3 C33 1.865(5) . ? 
Si3 C31 1.865(5) . ? 
Si3 C20 1.884(5) . ? 
P1 C18 1.798(4) . ? 
P1 C12 1.802(4) . ? 
P1 C24 1.807(4) . ? 
P2 N1 1.575(4) . ? 
P2 C46 1.796(4) . ? 
P2 C40 1.804(4) . ? 
P2 C34 1.808(4) . ? 
P3 N1 1.580(4) . ? 
P3 C58 1.795(4) . ? 
P3 C52 1.798(4) . ? 
P3 C64 1.802(4) . ? 
C1 C6 1.402(8) . ? 
C1 C2 1.413(8) . ? 
C2 C3 1.393(9) . ? 
C3 C4 1.338(9) . ? 
C4 C5 1.395(9) . ? 
C5 C6 1.358(8) . ? 
C7 C12 1.407(6) . ? 
C7 C8 1.422(6) . ? 
C8 C9 1.391(6) . ? 
C9 C10 1.399(6) . ? 
C10 C11 1.380(6) . ? 
C11 C12 1.395(6) . ? 
C13 C18 1.408(6) . ? 
C13 C14 1.418(6) . ? 
C14 C15 1.407(6) . ? 
C15 C16 1.385(6) . ? 
C16 C17 1.364(6) . ? 
C17 C18 1.412(6) . ? 
C19 C24 1.392(6) . ? 
C19 C20 1.416(6) . ? 
C20 C21 1.400(6) . ? 
C21 C22 1.378(6) . ? 
C22 C23 1.391(6) . ? 
C23 C24 1.404(6) . ? 
C34 C39 1.381(6) . ? 
C34 C35 1.402(6) . ? 
C35 C36 1.384(6) . ? 
C36 C37 1.389(6) . ? 
C37 C38 1.390(6) . ? 
C38 C39 1.390(6) . ? 
C40 C41 1.391(6) . ? 
C40 C45 1.391(6) . ? 
C41 C42 1.389(7) . ? 
C42 C43 1.381(7) . ? 
C43 C44 1.393(7) . ? 
C44 C45 1.384(6) . ? 
C46 C47 1.394(6) . ? 
C46 C51 1.396(6) . ? 
C47 C48 1.391(7) . ? 
C48 C49 1.361(8) . ? 
C49 C50 1.378(8) . ? 
C50 C51 1.391(7) . ? 
C52 C57 1.390(6) . ? 
C52 C53 1.396(6) . ? 
C53 C54 1.389(7) . ? 
C54 C55 1.377(8) . ? 
C55 C56 1.392(8) . ? 
C56 C57 1.385(7) . ? 
C58 C59 1.378(6) . ? 
C58 C63 1.388(6) . ? 
C59 C60 1.395(7) . ? 
C60 C61 1.369(8) . ? 
C61 C62 1.367(7) . ? 
C62 C63 1.394(6) . ? 
C64 C65 1.390(6) . ? 
C64 C69 1.393(6) . ? 
C65 C66 1.397(7) . ? 
C66 C67 1.376(7) . ? 
C67 C68 1.370(7) . ? 
C68 C69 1.393(6) . ? 
 
loop_ 
 _geom_angle_atom_site_label_1 
 _geom_angle_atom_site_label_2 
 _geom_angle_atom_site_label_3 
 _geom_angle 
 _geom_angle_site_symmetry_1 
 _geom_angle_site_symmetry_3 
 _geom_angle_publ_flag 
P1 Ni S3 87.76(4) . . ? 
P1 Ni S1 87.19(4) . . ? 
S3 Ni S1 119.39(5) . . ? 
P1 Ni S2 84.80(4) . . ? 
S3 Ni S2 132.94(5) . . ? 
S1 Ni S2 106.58(5) . . ? 
P1 Ni Se1 176.55(4) . . ? 
S3 Ni Se1 94.72(4) . . ? 
S1 Ni Se1 93.67(4) . . ? 
S2 Ni Se1 91.75(4) . . ? 
C1 Se1 Ni 112.08(16) . . ? 
C7 S1 Ni 105.79(14) . . ? 
C13 S2 Ni 104.15(15) . . ? 
C19 S3 Ni 107.06(14) . . ? 
C25 Si1 C26 110.6(3) . . ? 
C25 Si1 C27 106.1(2) . . ? 
C26 Si1 C27 108.0(3) . . ? 
C25 Si1 C8 112.8(2) . . ? 
C26 Si1 C8 110.8(2) . . ? 
C27 Si1 C8 108.2(2) . . ? 
C29 Si2 C28 111.0(2) . . ? 
C29 Si2 C30 108.1(2) . . ? 
C28 Si2 C30 106.7(2) . . ? 
C29 Si2 C14 110.7(2) . . ? 
C28 Si2 C14 111.9(2) . . ? 
C30 Si2 C14 108.4(2) . . ? 
C32 Si3 C33 107.9(3) . . ? 
C32 Si3 C31 110.9(3) . . ? 
C33 Si3 C31 108.2(2) . . ? 
C32 Si3 C20 111.8(2) . . ? 
C33 Si3 C20 108.7(2) . . ? 
C31 Si3 C20 109.2(2) . . ? 
C18 P1 C12 110.33(19) . . ? 
C18 P1 C24 107.57(19) . . ? 
C12 P1 C24 109.5(2) . . ? 
C18 P1 Ni 108.96(14) . . ? 
C12 P1 Ni 110.46(14) . . ? 
C24 P1 Ni 110.01(14) . . ? 
N1 P2 C46 114.47(19) . . ? 
N1 P2 C40 106.4(2) . . ? 
C46 P2 C40 107.0(2) . . ? 
N1 P2 C34 110.5(2) . . ? 
C46 P2 C34 109.0(2) . . ? 
C40 P2 C34 109.30(19) . . ? 
N1 P3 C58 109.6(2) . . ? 
N1 P3 C52 114.6(2) . . ? 
C58 P3 C52 106.6(2) . . ? 
N1 P3 C64 108.1(2) . . ? 
C58 P3 C64 109.1(2) . . ? 
C52 P3 C64 108.6(2) . . ? 
C6 C1 C2 117.9(5) . . ? 
C6 C1 Se1 122.7(4) . . ? 
C2 C1 Se1 119.0(4) . . ? 
C3 C2 C1 119.3(6) . . ? 
C4 C3 C2 121.8(6) . . ? 
C3 C4 C5 119.4(6) . . ? 
C6 C5 C4 120.9(6) . . ? 
C5 C6 C1 120.7(6) . . ? 
C12 C7 C8 119.7(4) . . ? 
C12 C7 S1 119.9(3) . . ? 
C8 C7 S1 120.3(3) . . ? 
C9 C8 C7 117.1(4) . . ? 
C9 C8 Si1 120.1(3) . . ? 
C7 C8 Si1 122.8(3) . . ? 
C8 C9 C10 123.3(4) . . ? 
C11 C10 C9 119.0(4) . . ? 
C10 C11 C12 119.9(4) . . ? 
C11 C12 C7 120.9(4) . . ? 
C11 C12 P1 124.3(3) . . ? 
C7 C12 P1 114.8(3) . . ? 
C18 C13 C14 120.0(4) . . ? 
C18 C13 S2 118.3(3) . . ? 
C14 C13 S2 121.7(3) . . ? 
C15 C14 C13 116.5(4) . . ? 
C15 C14 Si2 118.4(3) . . ? 
C13 C14 Si2 124.9(3) . . ? 
C16 C15 C14 123.4(4) . . ? 
C17 C16 C15 119.8(4) . . ? 
C16 C17 C18 119.6(4) . . ? 
C13 C18 C17 120.7(4) . . ? 
C13 C18 P1 114.3(3) . . ? 
C17 C18 P1 125.0(3) . . ? 
C24 C19 C20 120.5(4) . . ? 
C24 C19 S3 119.3(3) . . ? 
C20 C19 S3 120.1(3) . . ? 
C21 C20 C19 116.5(4) . . ? 
C21 C20 Si3 120.4(3) . . ? 
C19 C20 Si3 123.1(3) . . ? 
C22 C21 C20 123.2(4) . . ? 
C21 C22 C23 119.9(4) . . ? 
C22 C23 C24 118.5(4) . . ? 
C19 C24 C23 121.2(4) . . ? 
C19 C24 P1 113.9(3) . . ? 
C23 C24 P1 124.8(3) . . ? 
C39 C34 C35 119.2(4) . . ? 
C39 C34 P2 118.6(3) . . ? 
C35 C34 P2 122.2(3) . . ? 
C36 C35 C34 120.0(4) . . ? 
C35 C36 C37 120.4(4) . . ? 
C36 C37 C38 119.8(4) . . ? 
C37 C38 C39 119.6(4) . . ? 
C34 C39 C38 121.0(4) . . ? 
C41 C40 C45 120.0(4) . . ? 
C41 C40 P2 121.1(3) . . ? 
C45 C40 P2 118.9(3) . . ? 
C42 C41 C40 119.7(4) . . ? 
C43 C42 C41 120.3(5) . . ? 
C42 C43 C44 119.9(4) . . ? 
C45 C44 C43 120.1(4) . . ? 
C44 C45 C40 119.9(4) . . ? 
C47 C46 C51 119.5(4) . . ? 
C47 C46 P2 121.3(3) . . ? 
C51 C46 P2 118.9(3) . . ? 
C48 C47 C46 119.4(4) . . ? 
C49 C48 C47 120.9(5) . . ? 
C48 C49 C50 120.4(5) . . ? 
C49 C50 C51 120.1(5) . . ? 
C50 C51 C46 119.7(5) . . ? 
C57 C52 C53 119.7(4) . . ? 
C57 C52 P3 120.2(4) . . ? 
C53 C52 P3 119.7(3) . . ? 
C54 C53 C52 119.4(5) . . ? 
C55 C54 C53 121.0(5) . . ? 
C54 C55 C56 119.5(5) . . ? 
C57 C56 C55 120.2(5) . . ? 
C56 C57 C52 120.2(5) . . ? 
C59 C58 C63 120.1(4) . . ? 
C59 C58 P3 121.0(3) . . ? 
C63 C58 P3 118.8(3) . . ? 
C58 C59 C60 119.8(5) . . ? 
C61 C60 C59 120.2(5) . . ? 
C62 C61 C60 120.1(4) . . ? 
C61 C62 C63 120.8(5) . . ? 
C58 C63 C62 119.0(4) . . ? 
C65 C64 C69 120.4(4) . . ? 
C65 C64 P3 121.9(3) . . ? 
C69 C64 P3 117.7(3) . . ? 
C64 C65 C66 119.3(4) . . ? 
C67 C66 C65 120.1(5) . . ? 
C68 C67 C66 120.5(5) . . ? 
C67 C68 C69 120.7(5) . . ? 
C68 C69 C64 119.0(4) . . ? 
P2 N1 P3 141.3(2) . . ? 
 
_diffrn_measured_fraction_theta_max    0.998 
_diffrn_reflns_theta_full              27.50 
_diffrn_measured_fraction_theta_full   0.998 
_refine_diff_density_max    0.884 
_refine_diff_density_min   -2.485 
_refine_diff_density_rms    0.125 
